# Supplementary material for: Spectral-Free Double Light Detection of DNA Based on a Porous Silicon Bragg Mirror
Source: MDPI journal article supplement (doi:10.3390/s22187048), 2022-09-17
Supplement: s1 [file s1]

## Supplementary material

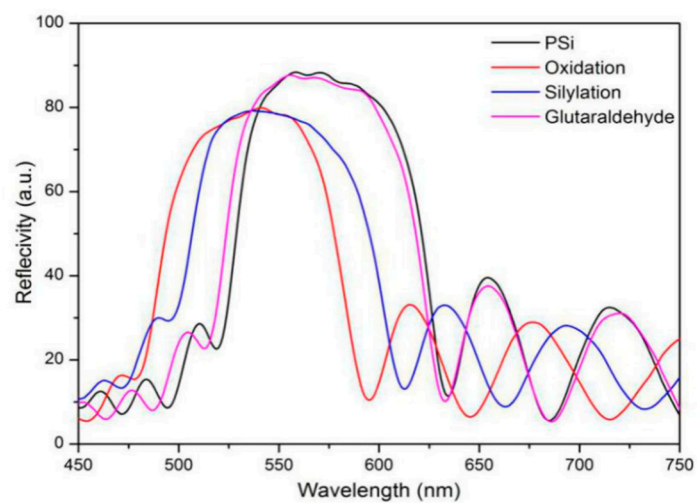

**Figure S1.** Reflection spectrum comparison of the PSBM after each step of functionalization.

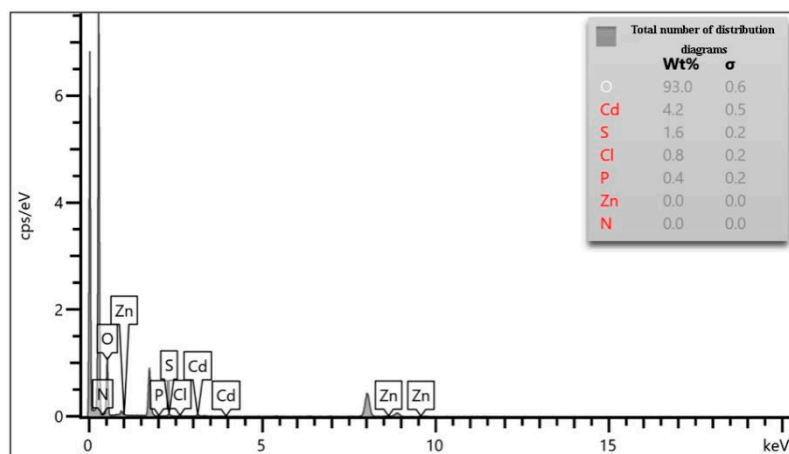

**Figure S2.** EDS-TEM spectra of CdSe/ZnS QD-COOH.

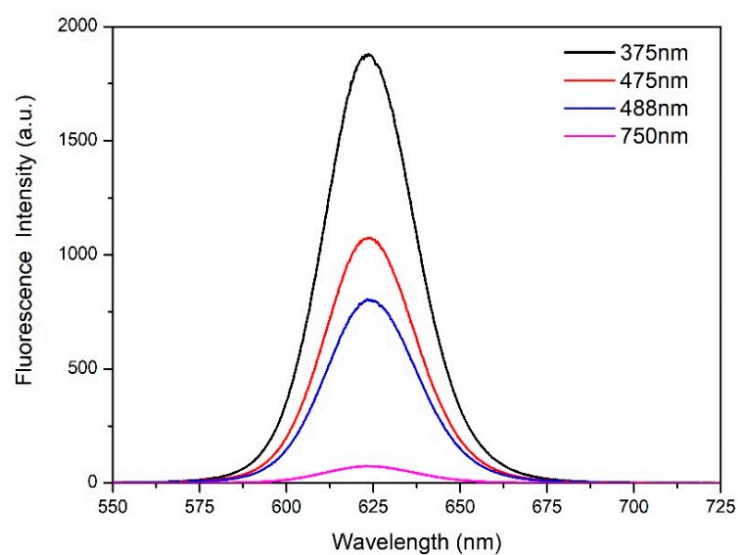

**Figure S3.** Fluorescence spectra of QDs excited by four wavelengths of excitation light.

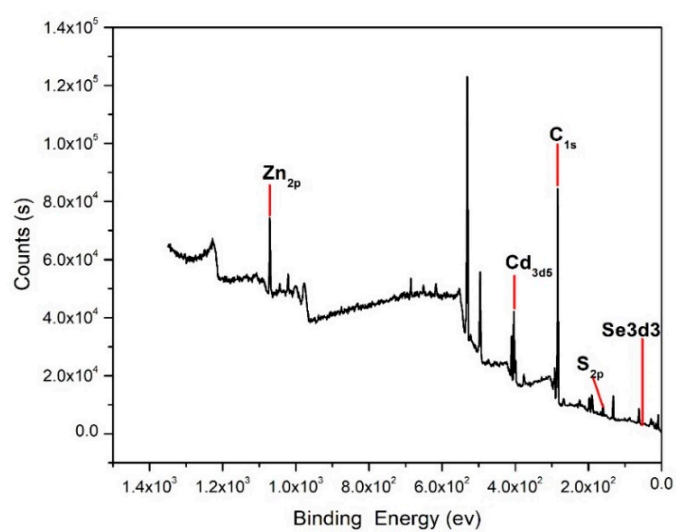

**Figure S4.** XPS spectrum of QDs.

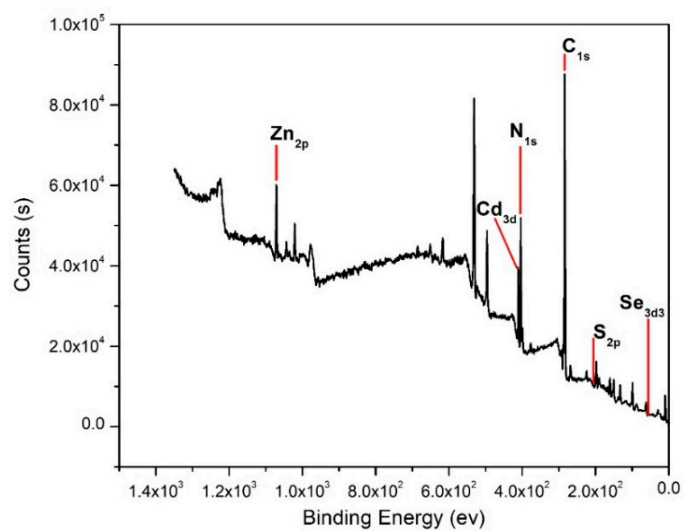

**Figure S5.** XPS spectrum of the probe DNA molecules coupled with QDs.

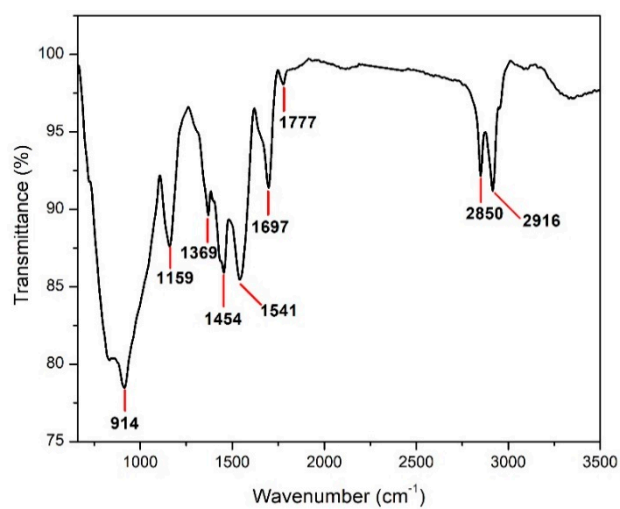

**Figure S6.** Fourier transform infrared spectroscopy of DNA molecules coupled with QDs.

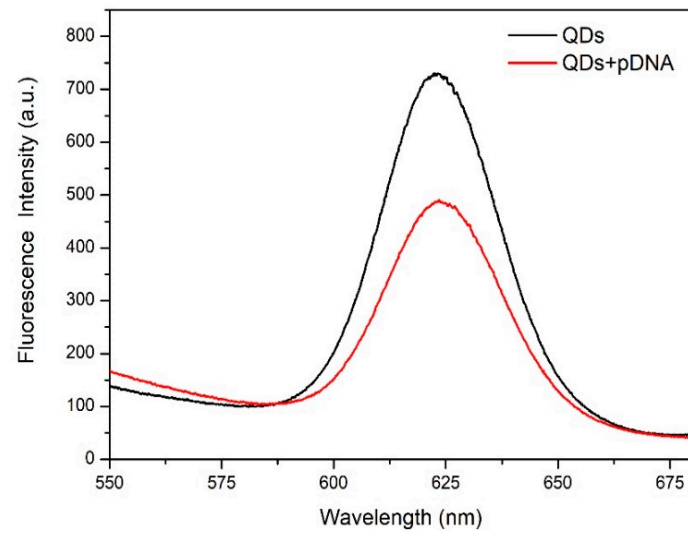

**Figure S7.** Fluorescence spectra of QDs and 10 $\mu$ M probe DNA before and after coupling.

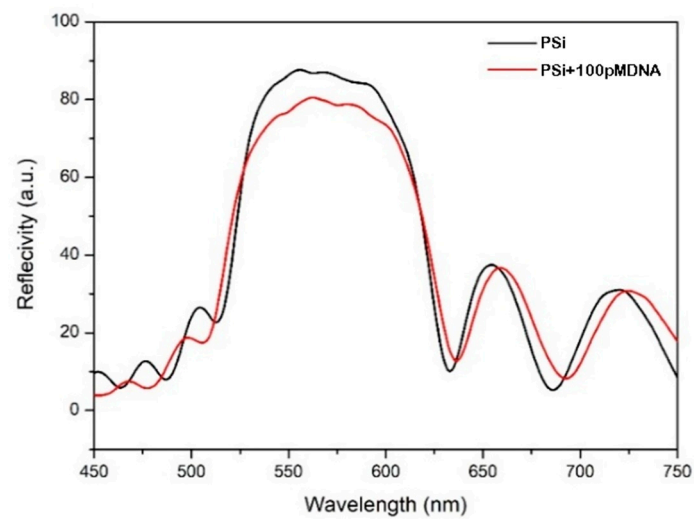

**Figure S8.** Comparison of reflectance spectra of target DNA before and after immobilization in PSBM hole.
